# Supplementary material for: OncoPan®: An NGS-Based Screening Methodology to Identify Molecular Markers for Therapy and Risk Assessment in Pancreatic Ductal Adenocarcinoma
Source: MDPI journal article supplement (doi:10.3390/biomedicines10051208), 2022-05-23
Supplement: s1 [file s1]

Supplementary Materials

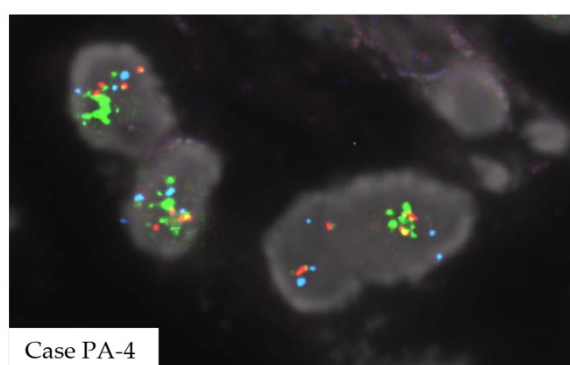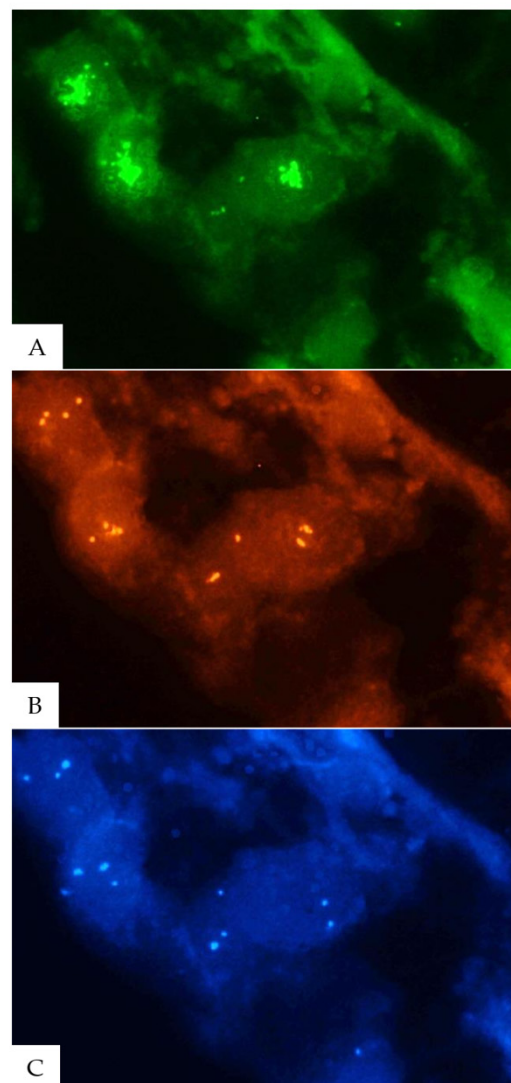

Figure S1

**Figure S1.** FISH analysis on PA-4 sample using Zytolight SPEC *HER2*/*TOP2A*/CEN17 Triple Color Probe (Zytovision). Imagies were obtained with Bioview system (Abbott) and fluorescence microscope at 1200× magnification: (A) merge of *HER2* signals (green), *TOP2A* signals (red) and chromosome 17 centromere signals (aqua). FISH analysis revealed amplification of *HER2* gene, diploidy and polisomy of *TOP2A* region and diploidy and polisomy of chromosome 17.

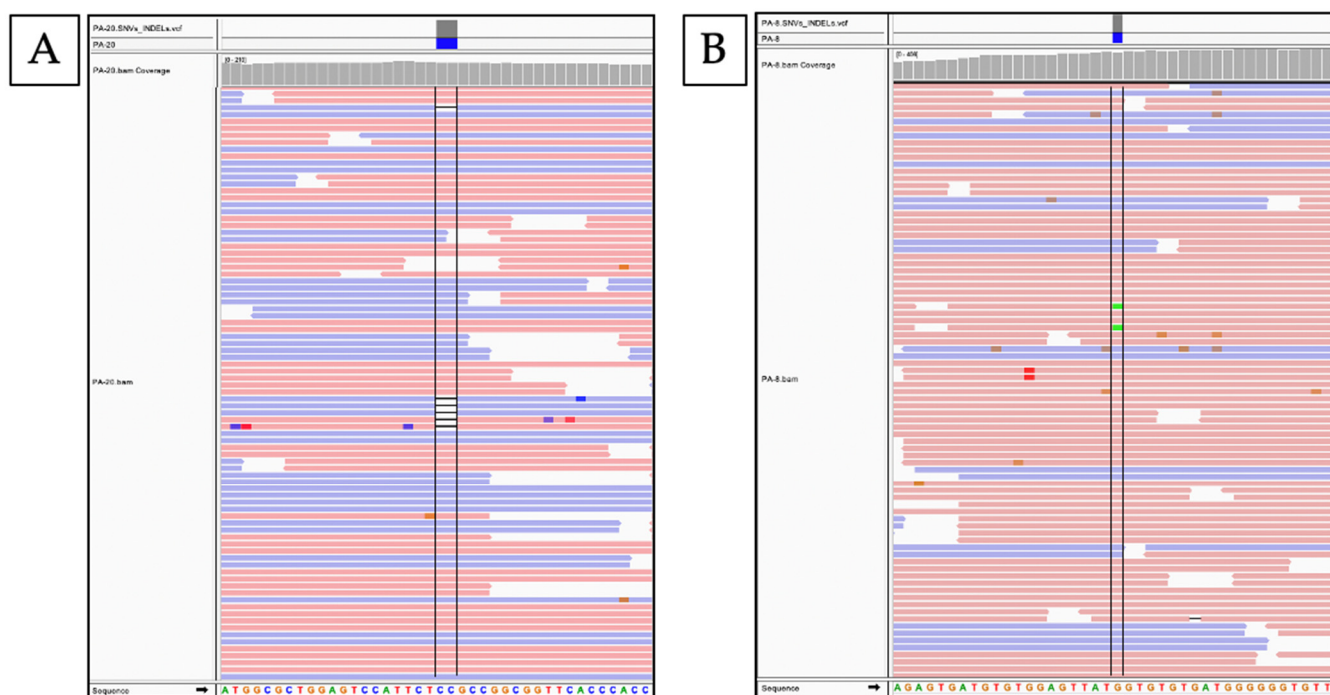

**Figure S2.** The picture shows the Integrative Genomics Viewer (IGV) analysis of the *HER2* variants: A) c.2685\_2686del p.(Arg896Profs\*8) in PA20 sample and B) c.2725G>A p.(Gly909Ser) in PA8 sample. Each track comprises three parts: a bicolor histogram that identifies the variant position (upper pane); a grey histogram of the read depth (middle pane); the reads as aligned to the reference sequence (lower pane).

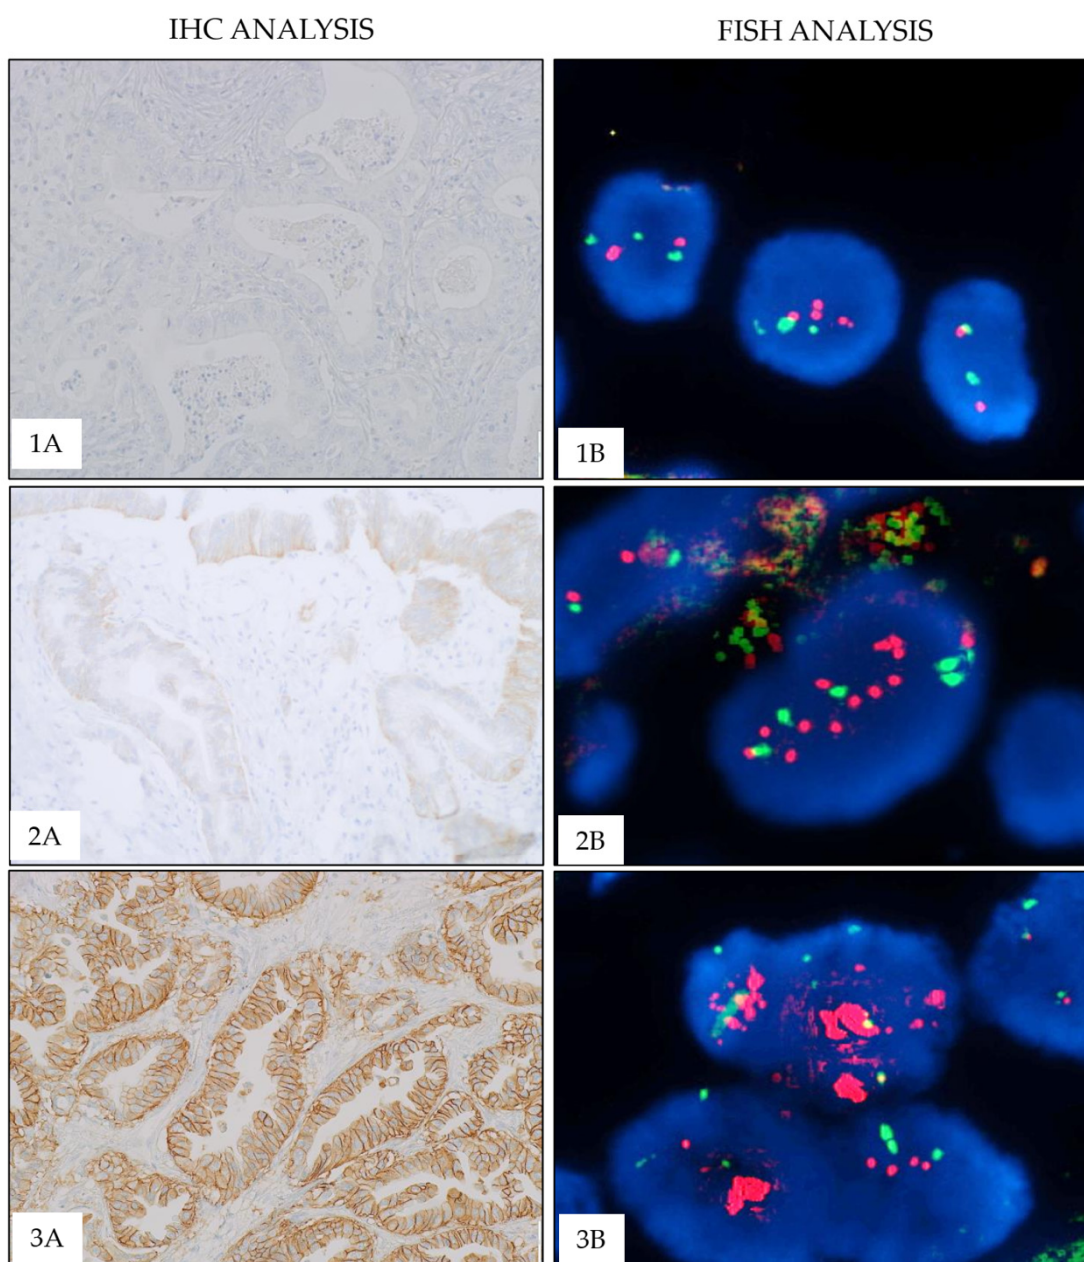

**Figure S3.** Immunohistochemical and FISH results: case PA3 showing negative *HER2* expression (1A) and absence of *HER2* gene amplification (1B); case PA1 showing weak/moderate *HER2* expression (2A) and *HER2* amplification (2B); case PA4 showing *HER2* overexpression (3A) and gene amplification (3B, red signal). Immunohistochemistry, DAB-hematoxylin; FISH images were obtained using a fluorescence microscope at 1200× magnification and Bioview system (Abbott).



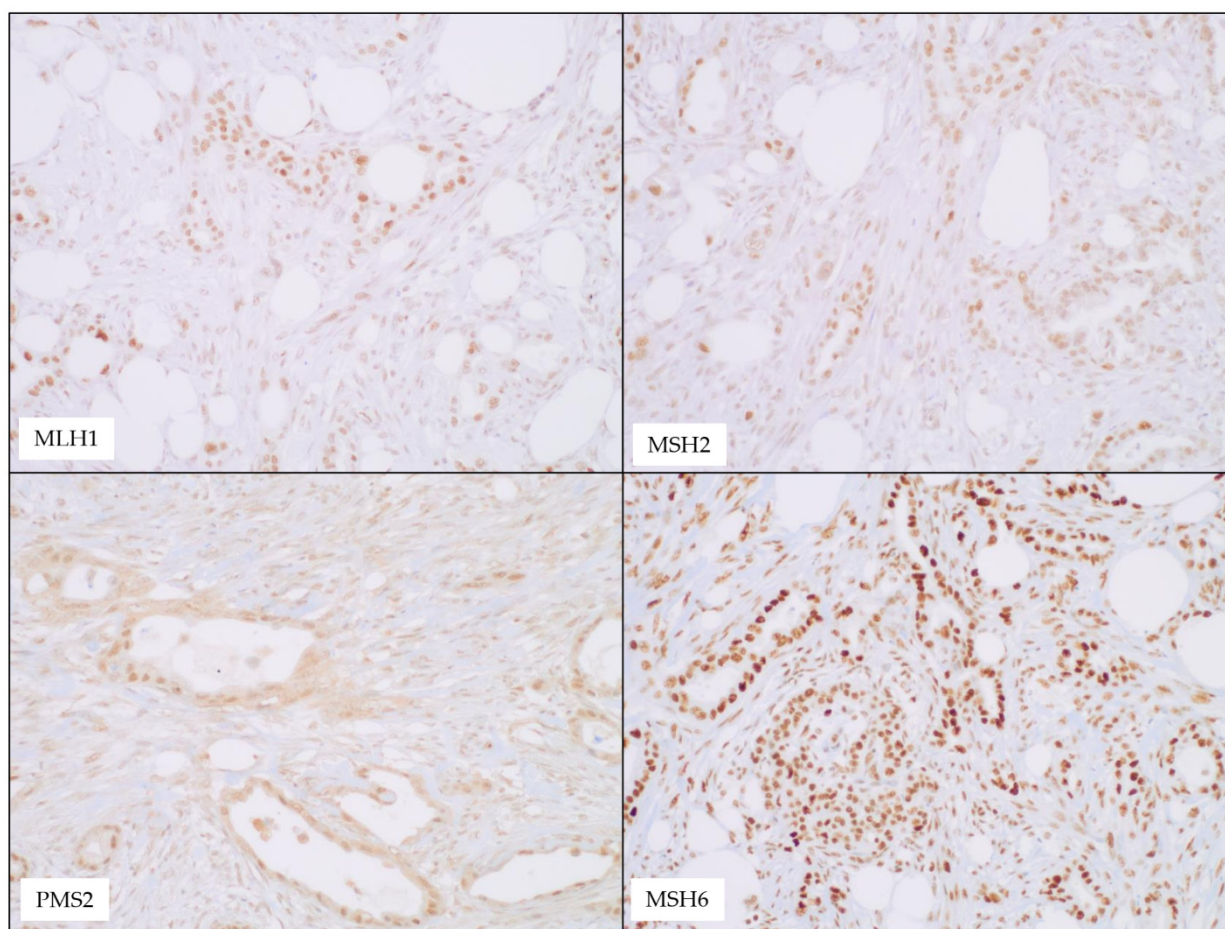

**Figure S4.** Immunohistochemical normal expression of MMR proteins in PA12.

**Table S1.** List of 37 genes and 2 pseudogenes included in the Oncopan® panel\_v2.

| Gene                        | GenBank number | accession | Locus Reference  | Genomic | Associated syndrome                          | Risk level                                          |
|-----------------------------|----------------|-----------|------------------|---------|----------------------------------------------|-----------------------------------------------------|
| <i>APC</i>                  | NM_000038      |           | LRG_130t1        |         | <i>APC</i> -associated polyposis             | High                                                |
|                             |                |           |                  |         | Pancreatic cancer                            | Low                                                 |
| <i>ATM</i>                  | NM_000051      |           | LRG_135t1        |         | Ataxia-telangectasia                         | Biallelic mutations: high                           |
|                             |                |           |                  |         | Hereditary breast/pancreatic/prostate cancer | Heterozygotes: moderate at most                     |
| <i>BARD1</i>                | NM_000465      |           | LGR_297t1        |         | Hereditary breast cancer                     | Low / moderate                                      |
| <i>BMPRIA</i>               | NM_004329      |           | LRG_298t1        |         | Juvenile polyposis                           | High                                                |
| <i>BRAF</i>                 | NM_004333      |           | LRG_299t1        |         | NO                                           | NO                                                  |
| <i>BRCA1</i>                | NM_007294      |           | LRG_292t1        |         | Hereditary breast/ovarian cancer             | High                                                |
|                             |                |           |                  |         | Pancreatic cancer                            | Moderate                                            |
| <i>BRCA2</i>                | NM_000059      |           | LRG_293t1        |         | Hereditary breast/ovarian cancer             | High                                                |
|                             |                |           |                  |         | Pancreatic cancer                            | Moderate                                            |
| <i>BRIP1</i>                | NM_032043      |           | LRG_300t1        |         | Ovarian Cancer                               | Low / moderate                                      |
| <i>CDH1</i>                 | NM_004360      |           | LRG_301t1        |         | Diffuse hereditary gastric cancer            | High                                                |
| <i>CDKN2A</i><br>(p16INK4a) | NM_000077      |           | LRG_11t1         |         | Hereditary melanoma                          | High                                                |
| <i>CDKN2A</i><br>(p.14ARF)  | NM_058195      |           | LRG_11t2         |         | Pancreatic cancer                            | Moderate / High                                     |
| <i>CDK4</i>                 | NM_000075      |           | LRG_490t1        |         | Hereditary melanoma                          | High                                                |
| <i>CHEK2</i>                | NM_007194      |           | LRG_302t1        |         | Hereditary breast cancer                     | Moderate                                            |
| <i>CHEK2P2</i>              | NR_038836      |           | CHEK2 pseudogene |         | NO                                           | NO                                                  |
| <i>CTNNA1</i>               | NM_001903      |           | NO               |         | Diffuse hereditary gastric cancer            | Uncertain – presumed high from limited case reports |

|               |              |                 |                                    |                                                                          |
|---------------|--------------|-----------------|------------------------------------|--------------------------------------------------------------------------|
|               |              |                 |                                    |                                                                          |
| <i>EGFR</i>   | NM_005228    | LRG_304t1       | NO                                 | NO                                                                       |
| <i>EPCAM</i>  | NM_002354    | LRG_215t1       | Lynch syndrome                     | High                                                                     |
| <i>HER2</i>   | NM_004448    | LRG_724t2       | NO                                 | NO                                                                       |
| <i>FANCM</i>  | NM_020937    | LRG_502t1       | Hereditary breast cancer           | Low / Moderate                                                           |
| <i>KRAS</i>   | NM_033360    | LRG_344t2       | NO                                 | NO                                                                       |
| <i>MLH1</i>   | NM_000249    | LRG_216t1       | Lynch syndrome                     | High                                                                     |
|               |              |                 | Pancreatic cancer                  | Moderate                                                                 |
| <i>MSH2</i>   | NM_000251    | LRG_218t1       | Lynch syndrome                     | High                                                                     |
|               |              |                 | Pancreatic cancer                  | Moderate                                                                 |
| <i>MSH6</i>   | NM_000179    | LRG_219t1       | Lynch syndrome                     | High                                                                     |
|               |              |                 | Pancreatic cancer                  | Moderate                                                                 |
| <i>MSH3</i>   | NM_002439    | NO              | MSH3- associated Polyposis         | Biallelic mutations: Uncertain – presumed high from limited case reports |
| <i>MUTYH</i>  | NM_001128425 | LRG_220t1       | <i>MUTYH</i> -associated polyposis | Biallelic mutations: high<br>Heterozygotes: uncertain – moderate at most |
| <i>NBN</i>    | NM_002485    | LRG_158t1       | Hereditary breast cancer           | Low                                                                      |
| <i>NRAS</i>   | NM_002524    | LRG_92t1        | NO                                 | NO                                                                       |
| <i>NTHL1</i>  | NM_002528    | LRG_1366t1      | Recessive adenomatous polyposis    | Uncertain – presumed high from limited case reports                      |
| <i>PALB2</i>  | NM_024675    | LRG_308t1       | Hereditary breast cancer           | Moderate-high                                                            |
|               |              |                 | Pancreatic cancer                  | Moderate                                                                 |
| <i>PIK3CA</i> | NM_006218    | LRG_310t1       | NO                                 | NO                                                                       |
| <i>PMS2</i>   | NM_000535    | LRG_161t1       | Lynch syndrome                     | Moderate-High                                                            |
| <i>PMS2CL</i> | NR_002217    | PMS2 pseudogene | NO                                 | NO                                                                       |

|               |           |           |                                                     |                                                     |
|---------------|-----------|-----------|-----------------------------------------------------|-----------------------------------------------------|
| <i>POLD1</i>  | NM_002691 | LRG_785t1 | Polymerase proofreading-associated polyposis (PPAP) | Uncertain – presumed high from limited case reports |
| <i>POLE</i>   | NM_006231 | LRG_789t1 | Polymerase proofreading-associated polyposis (PPAP) | Uncertain – presumed high from limited case reports |
| <i>PTEN</i>   | NM_000314 | LRG_311t1 | Cowden syndrome                                     | Moderate-high                                       |
| <i>RAD51C</i> | NM_058216 | LRG_314t1 | Hereditary ovarian cancer                           | Moderate                                            |
| <i>RAD51D</i> | NM_002878 | LRG_516t1 | Hereditary ovarian cancer                           | Moderate                                            |
| <i>SMAD4</i>  | NM_005359 | LRG_318t1 | Juvenile polyposis                                  | High                                                |
| <i>STK11</i>  | NM_000455 | LRG_319t1 | Peutz-Jeghers syndrome                              | High                                                |
|               |           |           | Pancreatic cancer                                   | High                                                |
| <i>TP53</i>   | NM_00546  | LRG_321t1 | Li Fraumeni syndrome                                | High                                                |

**Table S2.** - List of variants detected by the Oncopan® panel\_v2. Only pathogenic (class5), probably pathogenic (class4) and variants of uncertain significance (class3) are included.

| Sample ID | Gene                            | Mutation type  | Nucleotide HGVS <sup>a</sup>         | Protein HGVS <sup>a</sup> | dbSNP <sup>b</sup> | AF% <sup>c</sup> | Classification |
|-----------|---------------------------------|----------------|--------------------------------------|---------------------------|--------------------|------------------|----------------|
| PA1       | <i>KRAS</i>                     | Missense       | c.35G>T                              | p.(Gly12Val)              | rs121913529        | 20%              | P              |
|           | <i>MSH3</i>                     | Missense       | c.1088C>A                            | p.(Thr363Asn)             | NA                 | 11%              | VUS            |
|           | <i>SMAD4</i>                    | Nonsense       | c.247C>T                             | p.(Gln83*)                | NA                 | 12%              | P              |
|           | <i>TP53</i>                     | Missense       | c.817C>T                             | p.(Arg273Cys)             | rs121913343        | 26%              | P              |
| PA2       | <i>KRAS</i>                     | Missense       | c.34G>C                              | p.(Gly12Arg)              | rs121913530        | 45%              | P              |
|           | <i>TP53</i>                     | Missense       | c.380C>T                             | p.(Ser127Phe)             | rs730881999        | 56%              | P              |
| PA3       | <i>CDKN2A</i>                   | Frameshift     | c.45_88del                           | p.(Trp15Cysfs*14)         | NA                 | 17%              | P              |
|           | <i>KRAS</i>                     | Missense       | c.34G>C                              | p.(Gly12Arg)              | rs121913530        | 17%              | P              |
|           | <i>BRCA1</i>                    | Large deletion | c.(4986+1_4987-1)_(5074+1_5075-1)del | p.(Val1665Serfs*8)        | NA                 | NQ               | P              |
|           | <i>TP53</i>                     | Frameshift     | c.216dup                             | p.(Val73Argfs*16)         | rs730882018        | 21%              | P              |
| PA4       | <i>KRAS</i>                     | 3'UTR          | c.*4592G>A                           | 3'UTR                     | rs536562107        | 24%              | VUS            |
|           | <i>PIK3CA</i>                   | Missense       | c.2499G>A                            | p.(Met833Ile)             | NA                 | 19%              | VUS            |
|           | <i>SMAD4</i>                    | Frameshift     | c.1237_1249del                       | p.(Tyr413Lysfs*19)        | NA                 | 22%              | P              |
|           | <i>TP53</i>                     | Missense       | c.377A>G                             | p.(Tyr126Cys)             | NA                 | 29%              | P              |
| PA5       | <i>KRAS</i>                     | Missense       | c.35G>A                              | p.(Gly12Asp)              | rs121913529        | 8%               | P              |
|           | <i>TP53</i>                     | Nonsense       | c.880G>T                             | p.(Glu294*)               | rs1057520607       | 14%              | P              |
| PA6       | <i>CDKN2A</i>                   | Missense       | c.423C>A                             | p.(Asn141Lys)             | NA                 | 42%              | VUS            |
|           | <i>KRAS</i>                     | Missense       | c.35G>A                              | p.(Gly12Asp)              | rs121913529        | 37%              | P              |
|           | <i>TP53</i>                     | Nonsense       | c.772G>T                             | p.(Glu258*)               | NA                 | 38%              | P              |
| PA7       | <i>KRAS</i>                     | Missense       | c.35G>A                              | p.(Gly12Asp)              | rs121913529        | 28%              | P              |
|           | <i>PMS2/PMS2CL</i> <sup>d</sup> | Missense       | c.2380C>T                            | p.(Pro794Ser)             | rs773393960        | 15%              | VUS            |



| Genetic Alterations in PA8 |               |            |                     |                    |              |     |     |
|----------------------------|---------------|------------|---------------------|--------------------|--------------|-----|-----|
| PA8                        | <i>BRCA1</i>  | Missense   | c.2910A>C           | p.(Lys970Asn)      | rs431825394  | 37% | VUS |
|                            | <i>CHEK2</i>  | Missense   | c.1116_1117delinsTG | p.(Lys373Glu)      | NA           | 22% | VUS |
|                            | <i>HER2</i>   | Missense   | c.2725G>A           | p.Gly909Ser        | NA           | 2%  | VUS |
|                            | <i>KRAS</i>   | Missense   | c.34G>C             | p.(Gly12Arg)       | rs121913530  | 9%  | P   |
|                            | <i>SMAD4</i>  | Nonsense   | c.1324C>T           | p.(Gln442*)        | NA           | 26% | P   |
|                            | <i>TP53</i>   | Frameshift | c.455dup            | p.(Pro153Alafs*28) | rs730882019  | 22% | P   |
| PA9                        | <i>ATM</i>    | Missense   | c.1846A>G           | p.(Thr616Ala)      | rs587780615  | 29% | VUS |
|                            | <i>BRCA2</i>  | Missense   | c.8771A>C           | p.(Glu2924Ala)     | NA           | 25% | VUS |
|                            | <i>BRCA2</i>  | Missense   | c.8968T>G           | p.(Trp2990Gly)     | NA           | 29% | VUS |
|                            | <i>KRAS</i>   | Missense   | c.35G>A             | p.(Gly12Asp)       | rs121913529  | 3%  | P   |
|                            | <i>MSH2</i>   | Nonsense   | c.301G>T            | p.(Glu101*)        | rs63750318   | 25% | P   |
|                            | <i>MSH2</i>   | Missense   | c.2703A>C           | p.(Glu901Asp)      | NA           | 20% | VUS |
|                            | <i>PIK3CA</i> | Missense   | c.1082A>G           | p.(Tyr361Cys)      | NA           | 44% | VUS |
|                            | <i>PIK3CA</i> | Missense   | c.2T>A              | p.(?)              | NA           | 20% | VUS |
|                            | <i>PIK3CA</i> | Missense   | c.2119G>A           | p.(Glu707Lys)      | rs3729687    | 40% | VUS |
| PA10                       | <i>CHEK2</i>  | Intronic   | c.320-5T>A          | -                  | rs121908700  | 51% | VUS |
|                            | <i>KRAS</i>   | Missense   | c.35G>A             | p.(Gly12Asp)       | rs121913529  | 5%  | P   |
|                            | <i>POLE</i>   | Nonsense   | c.5687C>A           | p.(Ser1896*)       | NA           | 9%  | VUS |
|                            | <i>PTEN</i>   | Nonsense   | c.871G>T            | p.(Glu291*)        | NA           | 4%  | VUS |
|                            | <i>RAD51D</i> | Missense   | c.698A>G            | p.(Glu233Gly)      | rs28363284   | 51% | B   |
|                            | <i>TP53</i>   | Nonsense   | c.298C>T            | p.(Gln100*)        | NA           | 17% | P   |
| PA11                       | <i>FANCM</i>  | Missense   | c.5584G>A           | p.(Val1862Met)     | rs1280753248 | 44% | VUS |
|                            | <i>POLD1</i>  | Missense   | c.3016G>A           | p.(Ala1006Thr)     | rs376197467  | 42% | VUS |
|                            | <i>CDKN2A</i> | Frameshift | c.131dup            | p.(Tyr44*)         | rs730881673  | 5%  | P   |

|      |                                 |                   |                   |                    |              |     |     |
|------|---------------------------------|-------------------|-------------------|--------------------|--------------|-----|-----|
| PA12 | <i>KRAS</i>                     | Missense          | c.35G>T           | p.(Gly12Val)       | rs121913529  | 3%  | P   |
|      | <i>MSH6</i>                     | Frameshift        | c.3126_3172+38del | p.?                | NA           | 2%  | LP  |
| PA13 | <i>KRAS</i>                     | Missense          | c.35G>T           | p.(Gly12Val)       | rs121913529  | 16% | P   |
|      | <i>MSH2</i>                     | Missense          | c.435T>G          | p.(Ile145Met)      | rs63750124   | 40% | VUS |
|      | <i>PMS2/PMS2CL</i> <sup>d</sup> | Missense          | c.1148A>T         | p.(Asn383Ile)      | NA           | 12% | VUS |
| PA14 | <i>PALB2</i>                    | Missense          | c.2353C>T         | p.(Pro785Ser)      | rs730881889  | 45% | VUS |
|      | <i>PIK3CA</i>                   | Missense          | c.1930T>C         | p.(Tyr644His)      | rs17849072   | 15% | VUS |
| PA15 | <i>BRCA1</i>                    | Intronic          | c.5074+107C>T     | -                  | rs373676607  | 16% | VUS |
|      | <i>BRCA2</i>                    | Frameshift        | c.2585_2586insC   | p.(Lys862Asnfs*19) | NA           | 12% | P   |
|      | <i>KRAS</i>                     | Missense          | c.35G>A           | p.(Gly12Asp)       | rs121913529  | 22% | P   |
|      | <i>TP53</i>                     | Missense          | c.818G>A          | p.(Arg273His)      | rs28934576   | 41% | P   |
| PA16 | <i>BRIP1</i>                    | Missense          | c.550G>T          | p.(Asp184Tyr)      | rs201047375  | 31% | VUS |
|      | <i>CTNNA1</i>                   | Missense          | c.2671G>A         | p.(Val891Met)      | rs771903880  | 52% | VUS |
|      | <i>TP53</i>                     | Nonsense          | c.437G>A          | p.(Trp146*)        | rs1206165503 | 5%  | P   |
| PA17 | <i>BRCA2</i>                    | Missense          | c.8480C>T         | p.(Pro2827Leu)     | NA           | 6%  | VUS |
|      | <i>CDH1</i>                     | Missense          | c.1489G>A         | p.(Glu497Lys)      | NA           | 9%  | VUS |
|      | <i>CDKN2A</i>                   | Missense          | c.242C>A          | p.(Pro81His)       | NA           | 37% | VUS |
|      | <i>KRAS</i>                     | Missense          | c.35G>A           | p.(Gly12Asp)       | rs121913529  | 10% | P   |
|      | <i>SMAD4</i>                    | Missense          | c.736C>A          | p.(Pro246Thr)      | rs876659967  | 52% | VUS |
|      | <i>TP53</i>                     | Missense          | c.743G>A          | p.(Arg248Gln)      | rs11540652   | 22% | P   |
| PA18 | <i>BRCA1</i>                    | Missense          | c.2395A>T         | p.(Asn799Tyr)      | NA           | 4%  | VUS |
|      | <i>CHEK2</i>                    | Missense          | c.1392G>T         | p.(Lys464Asn)      | rs764396738  | 6%  | VUS |
|      | <i>KRAS</i>                     | Missense          | c.35G>A           | p.(Gly12Asp)       | rs121913529  | 11% | P   |
|      | <i>MSH2</i>                     | In frame deletion | c.4_78del         | p.Ala2_Met26del    | NA           | 4%  | VUS |

|      |               |                   |                     |                    |             |     |     |
|------|---------------|-------------------|---------------------|--------------------|-------------|-----|-----|
|      | <i>MSH6</i>   | In frame deletion | c.1957_2010del      | p.Val653_Gly670del | NA          | 10% | VUS |
|      | <i>PMS2</i>   | Missense          | c.1004A>G           | p.(Asn335Ser)      | rs200513014 | 44% | VUS |
|      | <i>SMAD4</i>  | Missense          | c.353C>T            | p.(ala118Val)      | NA          | 6%  | P   |
| PA19 | <i>MSH6</i>   | Missense          | c.866G>C            | p.(Gly289Ala)      | rs368318845 | 47% | VUS |
| PA20 | <i>CHEK2</i>  | Missense          | c.1116_1117delinsTG | p.(Lys373Glu)      | NA          | 14% | VUS |
|      | <i>HER2</i>   | Frameshift        | c.2685_2686del      | p.(Arg896Profs*8)  | NA          | 4%  | LP  |
|      | <i>FANCM</i>  | Nonsense          | c.4270C>T           | p.(Arg1424*)       | rs751954386 | 20% | P   |
|      | <i>KRAS</i>   | Missense          | c.183A>C            | p.(Gln61His)       | rs17851045  | 16% | P   |
|      | <i>POLE</i>   | Missense          | c.5036G>A           | p.(Arg1679His)     | rs748940418 | 9%  | VUS |
| PA21 | <i>CDKN2A</i> | Frameshift        | c.131dup            | p.(Tyr44*)         | rs730881673 | 14% | P   |
|      | <i>KRAS</i>   | Missense          | c.34G>C             | p.(Gly12Arg)       | rs121913530 | 13% | P   |
|      | <i>MUTYH</i>  | Missense          | c.251A>G            | p.(Tyr84Cys)       | rs200747973 | 50% | VUS |
|      | <i>TP53</i>   | Missense          | c.844C>T            | p.(Arg282Trp)      | rs28934574  | 20% | P   |

Abbreviations: NA, not available; NQ, not quantifiable; P, pathogenic; LP, likely pathogenic; VUS, variant of uncertain significance; B, benign. <sup>a</sup> Mutation nomenclature according to the Human Genome Variation Society (HGVS <http://varnomen.hgvs.org>). <sup>b</sup> Variant reference according to the Single Nucleotide Polymorphism Database (dbSNP <http://www.ncbi.nlm.nih.gov/SNP>) <sup>c</sup> Mutant Allelic Frequency <sup>d</sup> Variant in either PMS2 or PMS2CL. Nomenclature referred to PMS2. Variants investigated by Sanger sequencing on DNA extracted from non-neoplastic tissue.
